# Supplementary material for: Design and synthesis of an S-scheme TiO2homojunction with an adjusted, well-defined phase for directional carrier transfer in solar water splitting
Source: Royal Society of Chemistry journal article supplement (doi:10.1039/d2qm00892k), 2022-12-06
Supplement: d2qm00892k1.pdf [file d2qm00892k1.pdf]

## Supplementary information

### **Design and synthesis of S-Scheme TiO<sub>2</sub> homojunction with adjusted well-defined phase for a directional carrier transfer in solar water splitting**

Xiaobing Wang<sup>a,\*</sup>, Yihao Zhang<sup>a,‡</sup>, Yu Cao<sup>a,‡</sup>, Zhi Zheng<sup>b,\*</sup>, Xiaowei Guo<sup>a,c</sup>, Jiabao Cui<sup>a</sup>, Xiangdong Lou<sup>a</sup>, Yuming Guo<sup>a</sup>, Huijun Liang<sup>c,\*</sup>, Zhansheng Lu<sup>d</sup>, Lin Yang<sup>a,\*</sup>, Hua Zhang<sup>a</sup> and Xiaoming Ma<sup>a,\*</sup>

<sup>a</sup> Collaborative Innovation Center of Henan Province for Green Manufacturing of Fine Chemicals, Key Laboratory of Green Chemical Media and Reactions, Ministry of Education, School of Chemistry and Chemical Engineering, Henan Normal University, Xinxiang, Henan 453007, P. R. China

<sup>b</sup> Key Laboratory for Micro-Nano Energy Storage and Conversion Materials of Henan Province, College of Advanced Materials and Energy, Institute of Surface Micro and Nano Materials, Xuchang University, 88 Bayi Road, Xuchang 461000, P. R. China.

<sup>c</sup> School of Chemistry and Materials Engineering, Xinxiang University, Xinxiang, Henan 453003, P. R. China

<sup>d</sup> School of Physics, Henan Normal University, Xinxiang 453007, P. R. China

## **1. Supplementary experimental section**

### **1.1. Materials**

Oxalic acid dihydrate ( $C_2H_2O_4 \cdot 2H_2O$ , 99.5%), Tetrabutyl titanate (TBOT, 98.0%), Ethanol ( $C_2H_5OH$ , 99.7%), Palladium(II) chlorid ( $PdCl_2$ , 59.0%), Ferrous chloride tetrahydrate ( $FeCl_2 \cdot 4H_2O$ , 99.0%) were obtained from Sinopharm Chemical Reagent Co., Ltd. (Shanghai, China). Hydrochloric acid (HCl, 36-38%) and potassium thiocyanate (KSCN, 98.5%) were purchased from Luoyang Chemical Reagent Factory (Henan, China). and Suzhou Chemical Reagent Factory (Zhejiang, China), respectively. All the reagents were used without further purification.

### **1.2. Preparations of photocatalysts**

#### **1.2.1. Preparations of $TiO_2$ -TELM**

$TiO_2$ -TELM samples were synthesized by a facile solvothermal reaction followed by annealing. First,  $C_2H_2O_4 \cdot 2H_2O$  (10 g) was completely dissolved in absolute ethanol (57 mL) under vigorous magnetic stirring for 10 min. Second, TBOT (4 mL) was added into the above transparent solution and ultrasound-dispersed for 5 min. Then, HCl (12 M, 6 mL) was added under vigorous stirring for 1 min to obtain a light yellow transparent solution. After that, the solution was transferred to a 100 mL Teflon-lined autoclave and maintained temperature at 150 °C for 15 h. After cooling down to room temperature, the white precipitates were collected by centrifugation at 5000 rpm for 10 min, followed by washed with absolute ethanol for three times, and dried in vacuum at 60 °C to obtain the precursor of  $TiO_2$ -TELM sample. Subsequently,  $TiO_2$ -TELM was obtained by annealing the precursor at 400 °C in air for 5 h.

Following the same procedures as that for the TiO<sub>2</sub>-TELM of 15 h, the TiO<sub>2</sub>-TELM at different time were synthesized, except for that the time of solvothermal reaction was adjusted to 5 and 15 min, 2, 5, 10, 20, and 25 h, respectively.

### **1.2.2. Preparations of Pd-TiO<sub>2</sub>**

Pd-TiO<sub>2</sub> composites were synthesized by the light-induced reduction method. First, 0.5 g as-prepared TiO<sub>2</sub>-TELM powders were dispersed in 250 mL deionized water under magnetic stirring. Then, the suspension was transferred into a quartz reactor that was held at 10 °C by a water-cooled jacket and irradiated by a 300 W Xenon lamp for 1 h. After that, 10 mL PdCl<sub>2</sub> aqueous solution (22.6 mM) was added and continuous irradiated for 15 min. Finally, the suspension was centrifuged, washed with deionized water and ethanol, and dried in vacuum at 60 °C for 12 h. Pd-TiO<sub>2</sub> composites were obtained.

### **1.3. Characterizations**

The purity and crystallinity of the as-prepared samples were characterized by X-ray diffraction (XRD, X'Pert<sup>3</sup> Powder XRD with Cu K $\alpha$  radiation,  $\lambda = 0.154$  nm, the accelerating voltage was set at 45 kV with a 40 mA flux, a step length of 0.1° and a preset time of 1 s/step). The morphologies and structure of the as-prepared samples were examined with transmission electron microscope (TEM, JEOL JEM-2100), high-resolution transmission electron microscopy (HRTEM, FEI Talos F200X), and field emission scanning electron microscopy (FESEM, Hitachi SU8010, an accelerating voltage of 200 kV). Diffuse reflection spectra (DRS) were obtained for the dry-pressed disk samples on a UV-vis spectrometer (Lambda950, PerkinElmer, America), and BaSO<sub>4</sub> was used as a reflectance standard. The steady-state and time-resolved transient photoluminescence (PL) measurements of samples were performed on an FLS980 fluorescence spectrometer (Edinburgh,

U.K.) at room temperature, the excitation wavelength is 373 and 405 nm, respectively. The valence band XPS spectra were measured by X-ray photoelectron spectroscopy (XPS, Thermo Fisher EscaLab Xi<sup>+</sup>, using Al K $\alpha$  X-ray source with 10 mA at 15 kV). Electron paramagnetic resonance spectra (EPR) of radicals were recorded under Ar ambiance at room temperature on a Bruker EPR spectrometer (A300). Superoxide radicals ( $\bullet\text{O}_2^-$ ) and hydroxyl radicals ( $\bullet\text{OH}$ ) was detected by trapping with 100 mM of 5, 5-dimethyl-1-pyrroline N-oxide (DMPO) using methanol and water as solvent, respectively. The sample was detected under dark or under irradiation with a 300 W Xenon lamp (PLS-SXE300D, Beijing Perfectlight Technology Co., Ltd.). All EPR spectra were recorded under the same condition for 2 and 10 min: microwave frequency, 9.85 GHz; center field, 3510 G; sweep width, 100 G; modulation frequency, 100 kHz; and power, 19.31 mW. The transient-state surface photovoltage was investigated on a home-made capacitor-like spectroscope,<sup>1</sup> where a Quantel Nd:YAG nanosecond laser (Brilliant Eazy, BRILEZ/IR) was used as the excitation source (355 nm, 4 ns, spot area of 0.24 cm<sup>2</sup>), coupled with a digital oscilloscope (Tektronix, TDS 3054C, 500 MHz) and pre-amplifier for recording.

#### **1.4. Catalyst activity measurements**

Photocatalytic water splitting experiments was conducted in a Pyrex top-irradiation vessel connected to a glass gas-closed circulation system (Labsolar-III, Beijing Perfectlight Technology Co., Ltd.). A 300 W Xenon lamp was used as the simulated solar irradiation (AM 1.5 G, 100 mW cm<sup>-2</sup>), and the temperature of the reaction system was controlled at 25 °C by circulating cooling water. 25 mg of photocatalyst was dispersed in 50 mL deionized water (The electrical conductivity of deionized water is approximately 4.7  $\mu\text{S cm}^{-1}$ ). Subsequently, the system was deoxygenated with

Ar for 30 min to remove the air before irradiation. The quantities of evolved gas were measured by an on-line gas chromatograph (GC-2014Plus, Shimadzu) with a TCD detector and Ar as carrier gas.

The apparent quantum efficiency was calculated using: A 300 W Xe lamp with an AM 1.5G filter was used as light source.

Apparent quantum efficiency (AQE):

$$\begin{aligned} AQEs(\%) &= \frac{N_e}{N_p} \times 100\% \\ &= \frac{10^9(v \times N_A \times K) \times (h \times c)}{(I \times A \times \lambda)} \times 100\% \end{aligned}$$

where  $N_p$  is Number of incident photons,  $N_e$  is Number of electrons transferred by the reaction,  $I$  is the power density of the light source ( $\text{W m}^{-2}$ ),  $A$  is the area of irradiation measured ( $\text{m}^2$ ),  $\lambda$  is the wavelength absorbed by the photocatalyst (nm),  $v$  is the rate of hydrogen formation per second ( $\text{mol s}^{-1}$ ),  $N_A$  is Avogadro's number ( $6.02 \times 10^{23}$  mol),  $K$  is Number of transferred electrons,  $h$  is Planck's constant ( $6.62 \times 10^{-34}$  J s), and  $c$  is the light velocity ( $3 \times 10^8$   $\text{m s}^{-1}$ ).

During the photocatalytic pure water splitting, the content of  $\text{H}_2\text{O}_2$  produced was measured by UV-vis spectrophotometer (TU-1900, Beijing). Because  $\text{Fe}^{2+}$  can be oxidized into  $\text{Fe}^{3+}$  by  $\text{H}_2\text{O}_2$  in an acidic environment ( $\text{pH}=1\sim 2$ ), and  $\text{Fe}^{3+}$  can be combined by KSCN to form  $[\text{Fe}(\text{SCN})]^{2+}$ , which has a maximum absorption peak at 475 nm.<sup>2</sup>

### 1.5. Photoelectrochemical and electrochemical measurements

The Mott-Schottky curves, photocurrent with ON/OFF cycles and electrochemical impedance spectra (EIS) were measured on an electrochemical workstation (CHI660E, Shanghai Chenhua, China) and carried out in a three-electrode system with a working electrode, Pt foil as the counter electrode, Ag/AgCl (saturated KCl) as reference electrode, respectively. 0.5 M  $\text{Na}_2\text{SO}_4$  aqueous

solution was used as the electrolyte solution. A 300 W Xenon lamp (Beijing Perfect Light Co., China) was utilized as the light source.

The working electrode was prepared as follows: 10 mg as-prepared TiO<sub>2</sub>-TELM samples was ultrasonically dispersed in 0.5 mL absolute ethanol for 30 min, then, 0.2 mL as-obtained suspension was loaded onto an FTO glass electrode (1.2 cm×2.5 cm) drying at 60 °C for 4 h. The catalyst on the FTO was about 1.33 mg cm<sup>-2</sup>.

Mott-Schottky plots were obtained at a frequency of 1000 Hz. The potential ranged from 1.0 to -2.0 V (vs. Ag/AgCl). The photocurrent with ON/OFF cycles was measured under chopped light irradiation at 0.6 V (vs. Ag/AgCl) potential. Electrochemical impedance spectra (EIS) were collected in the frequency range from 0.01 to 1 MHz with a 5 mV sinusoidal AC voltage.

### **1.6. The semi-quantitative calculation of rutile (W<sub>R</sub>) mass ratio**

According to the reference intensity ratio (RIR) methods and the XRD peak intensity (I),<sup>1</sup> the mass ratio of rutile (W<sub>R</sub>) can be semi-quantitative represented as:

$$W_R = I_R / (I_R + I_A * RIR_R / RIR_A)$$

Where I<sub>R</sub> and I<sub>A</sub> refer to the intensities of the rutile (110) and anatase (101) diffraction peaks, the RIR<sub>R</sub> and RIR<sub>A</sub> is respectively 3.4 and 3.3 according to the JCPDS No. 21-1276 and JCPDS No. 21-1272.

### **1.7. The calculation of RHE**

To remove the Nernstian pH-dependence of flat band potentials (E<sub>fb</sub>), we further refer the E<sub>fb</sub> values against the reversible hydrogen electrode (RHE):

$$E_{RHE} = E_{Ag/AgCl} + 0.0592 \text{ pH} + E_{0, Ag/AgCl}$$

Where the pH value of the  $\text{Na}_2\text{SO}_4$  electrolyte is 7.63,  $E_{\text{RHE}}$  is the converted potential versus RHE,  $E_{0,\text{Ag}/\text{AgCl}} = 0.197 \text{ V}$  at  $25 \text{ }^\circ\text{C}$ , and  $E_{\text{Ag}/\text{AgCl}}$  is the experimentally measured potential against the  $E_{0,\text{Ag}/\text{AgCl}}$  reference electrode.<sup>2</sup>

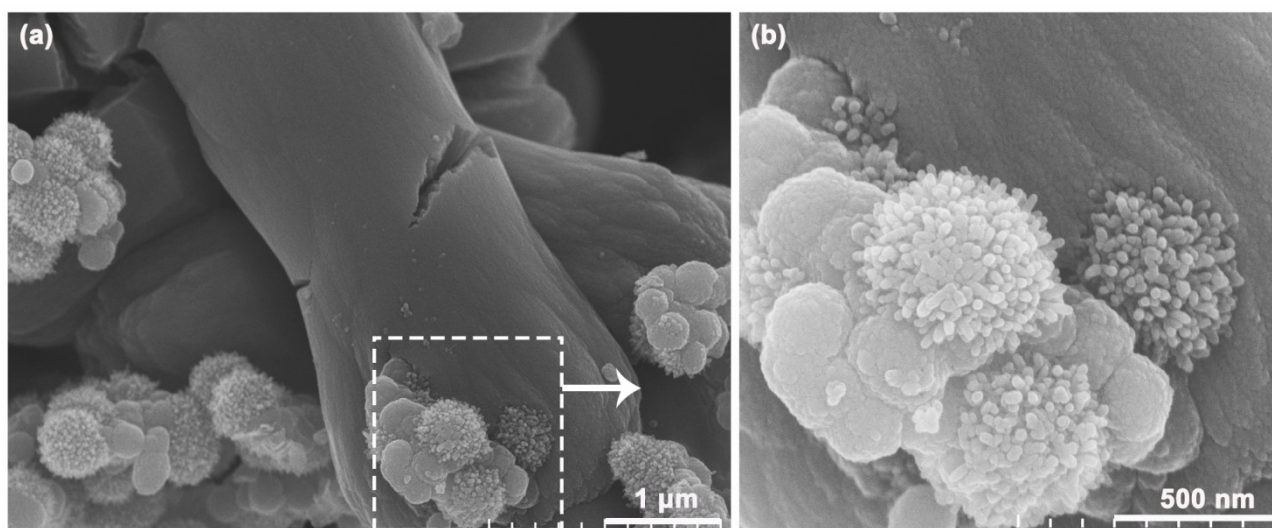

**Fig. S1** Different magnification FESEM images of as-prepared  $\text{TiO}_2$ -TELM at 15 min, which was annealed at  $400 \text{ }^\circ\text{C}$  in air for 5 h.

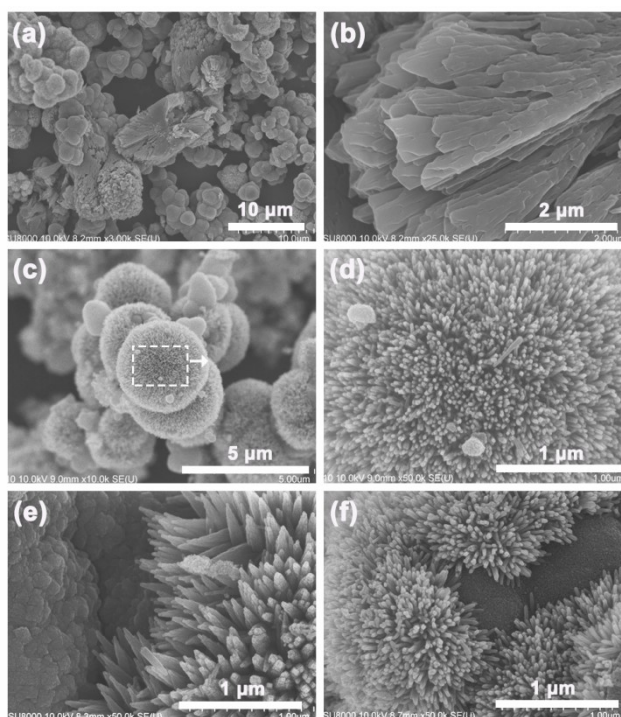

**Fig. S2** Different magnification FESEM images of  $\text{TiO}_2$ -TELM precursors at the different reaction time, (a) and (b) 5 h, (c) and (d) 25 h, annealing before (e) and after (f) of  $\text{TiO}_2$ -TELM 15 h.

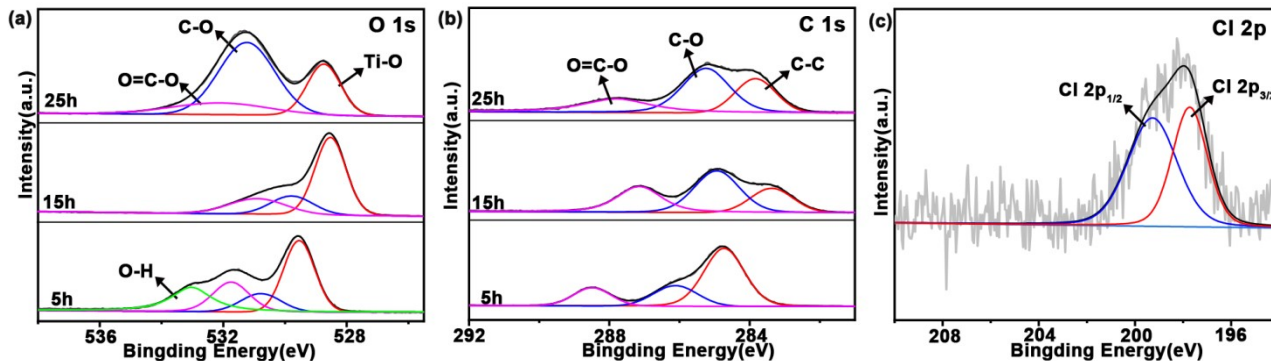

**Fig. S3** High-resolution XPS spectra of (a) O 1s, (b) C 1s and (c) Cl 2p, respectively.



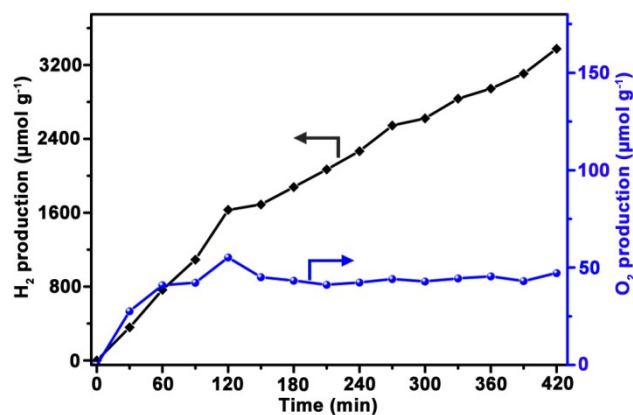

**Fig. S4** Photocatalytic H<sub>2</sub> and O<sub>2</sub> evolution activities of as-prepared Pd-TiO<sub>2</sub> composites (15 h).

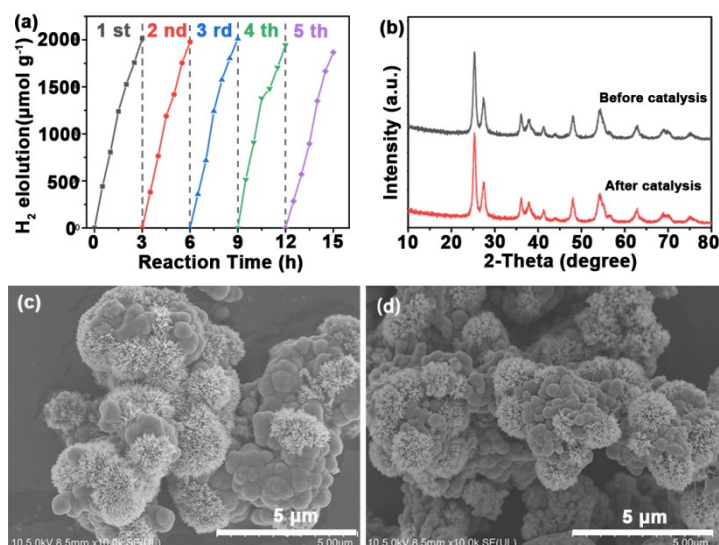

**Fig. S5** (a) Photocatalytic stability of the Pd-TiO<sub>2</sub> composites (15 h) photocatalyst. (b) XRD patterns of Pd-TiO<sub>2</sub> (15 h) before and after catalysis. FESEM images of Pd-TiO<sub>2</sub> (15 h) before (c) and after catalysis (d).

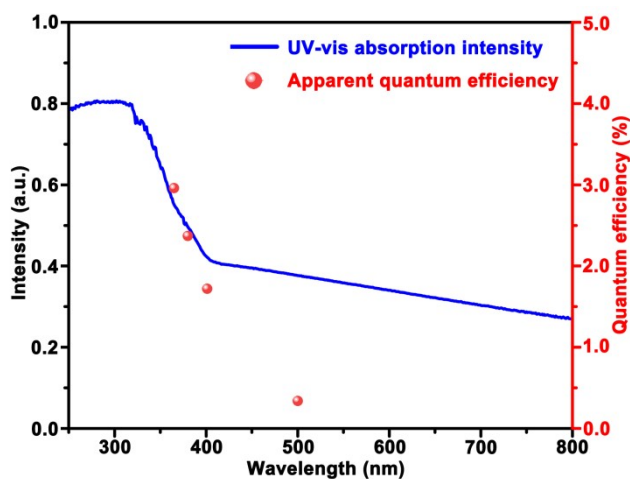

**Fig. S6** Wavelength dependence of AQE of Pd-TiO<sub>2</sub> (15 h).

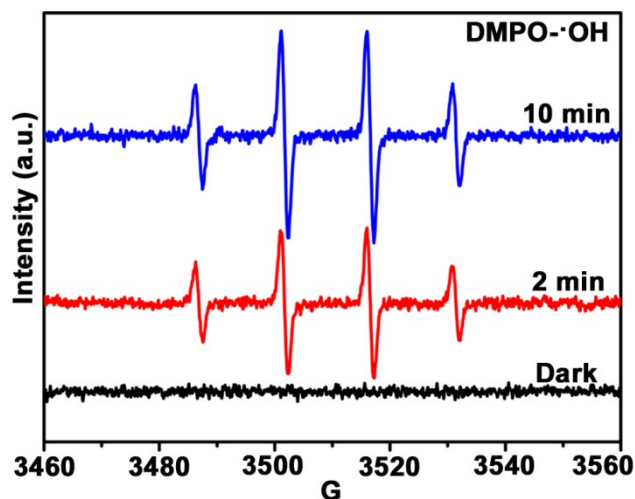

**Fig. S7** Typical EPR spectra for photocatalytic splitting H<sub>2</sub>O on Pd-TiO<sub>2</sub> in the presence of DMPO as an electron trapping agent. The signals were collected under light irradiation. Without light irradiation, no signal was detected. Conditions: DMPO, 100 mM; in Ar; irradiation time, 2 and 10 min; light Source: 300 W Xe lamp.

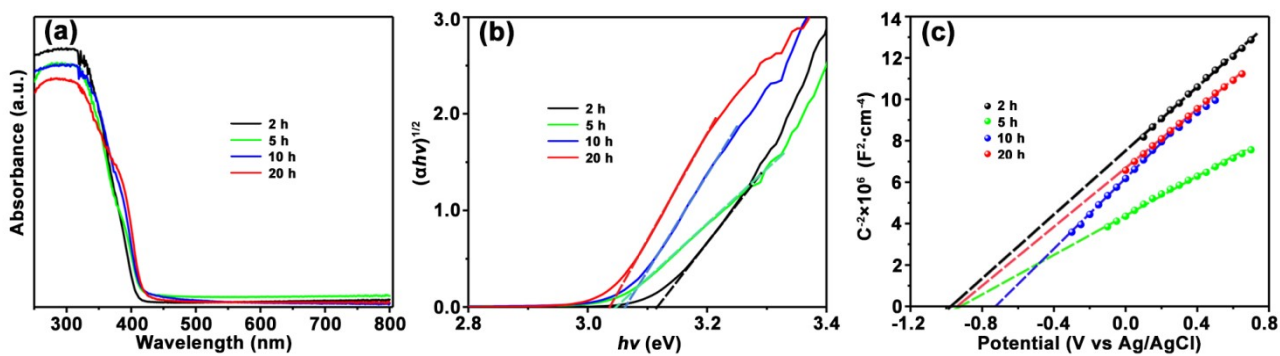

**Fig. S8** (a) UV-vis DRS, (b) Tauc plots, and (c) Mott-Schottky plots for as-prepared TiO<sub>2</sub>-TELM samples.

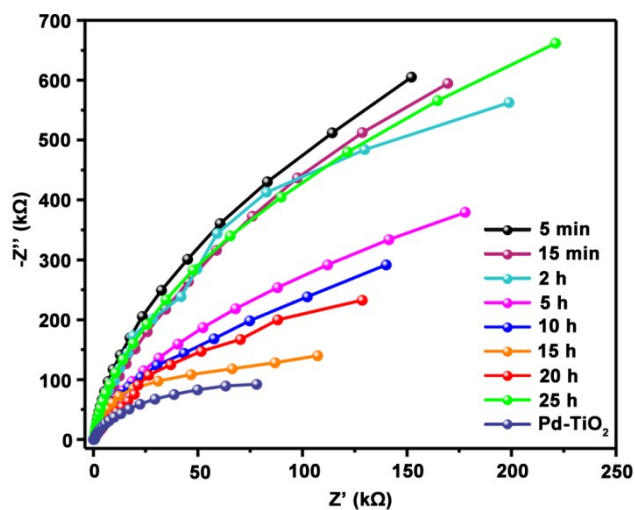

**Fig. S9** Nyquist plots of electrochemical impedance spectra (EIS) for as-prepared TiO<sub>2</sub>-TELM samples and Pd-TiO<sub>2</sub>.

**Table S1.** Comparison of the photocatalytic H<sub>2</sub> evolution efficiency between previous reports and Pd-TiO<sub>2</sub> photocatalysts on the water splitting.

| No. | Catalysts                                                               | Cocatalyst  | Catal. /water<br>(mg/mL) | Light source  | H <sub>2</sub> rate<br>( $\mu\text{mol h}^{-1}\text{g}^{-1}$ ) | O <sub>2</sub> or (H <sub>2</sub> O <sub>2</sub> )<br>rate<br>( $\mu\text{mol h}^{-1}\text{g}^{-1}$ ) | Ref.      |
|-----|-------------------------------------------------------------------------|-------------|--------------------------|---------------|----------------------------------------------------------------|-------------------------------------------------------------------------------------------------------|-----------|
| 1.  | TiO <sub>2</sub> (A)/TiO <sub>2</sub> (R)                               | 1% Pd       | 25/50                    | 300 W Xe lamp | 816/(2h)                                                       | O <sub>2</sub> and H <sub>2</sub> O <sub>2</sub>                                                      | This work |
| 2.  | TiO <sub>2</sub> (A)/TiO <sub>2</sub> (R)                               | Pt/CoP      | 20/100                   | 300 W Xe lamp | 614                                                            | 297                                                                                                   | 3         |
| 3.  | Rutile TiO <sub>2</sub> (111)/(101)                                     | 1% Pt       | 50/100                   | 100 W Hg lamp | 566/(2h)                                                       | --                                                                                                    | 4         |
| 4.  | TiO <sub>2</sub> (A)/TiO <sub>2</sub> (B)/TiO <sub>2</sub> (R)          | N-doped     | 5/50                     | Sun light     | 192                                                            | --                                                                                                    | 5         |
| 5.  | TiO <sub>2</sub> (B) big/small                                          | 0.5 wt % Pt | 50/100                   | 300 W Xe lamp | 149                                                            | --                                                                                                    | 6         |
| 6.  | Pt/TiO <sub>2</sub>                                                     | --          | --                       | 300 W Xe lamp | 62.9                                                           | 31.5                                                                                                  | 7         |
| 7.  | TiO <sub>2</sub> (R)                                                    | 0.2wt% Pt   | 50/150                   | 300 W Xe lamp | 33.8                                                           | 16.6                                                                                                  | 8         |
| 8.  | CdS/Pt-N-TiO <sub>2</sub>                                               | 0.5%-Pt     | 50/275                   | 125 W Hg lamp | 639.2                                                          | 319                                                                                                   | 9         |
| 9.  | Ti <sub>3</sub> C <sub>2</sub> T <sub>x</sub> @TiO <sub>2</sub>         | Black P     | 10/100                   | 300 W Xe lamp | 564.8                                                          | 400(H <sub>2</sub> O <sub>2</sub> )                                                                   | 10        |
| 10. | Ti <sub>3</sub> C <sub>2</sub> -TiO <sub>2</sub>                        | Pt          | 20/100                   | 300 W Xe lamp | 526                                                            | 315                                                                                                   | 11        |
| 11. | Ti <sub>3</sub> C <sub>2</sub> (TiO <sub>2</sub> )@CdS/MoS <sub>2</sub> | --          | 30/100                   | 300 W Xe lamp | 344.74                                                         | --                                                                                                    | 12        |
| 12. | 0D/2D TiO <sub>2</sub> /g-C <sub>3</sub> N <sub>4</sub>                 | 3% Pt       | 10/25                    | 300 W Xe lamp | 329.5                                                          | 159.6                                                                                                 | 13        |
| 13. | Fe <sub>2</sub> O <sub>3</sub> -TiO <sub>2</sub>                        | --          | 1/20                     | 150 W Xe lamp | 323                                                            | --                                                                                                    | 14        |
| 14. | GaP-TiO <sub>2</sub> -SiO <sub>2</sub>                                  | 0.3wt% Pt   | 500/100                  | 300 W Xe lamp | 80.1                                                           | 41.2                                                                                                  | 15        |
| 15. | Co <sub>3</sub> O <sub>4</sub> /TiO <sub>2</sub>                        | --          | 50/100                   | 300 W Xe lamp | 41.8                                                           | 24.2                                                                                                  | 16        |
| 16. | g-C <sub>3</sub> N <sub>3.5</sub> (O <sub>0.5</sub> H <sub>0.5</sub> )  | 2 wt % Pt   | 30/100                   | 300 W Xe-lamp | 947.7                                                          | 67.2                                                                                                  | 17        |

| No. | Catalysts                                                                       | Cocatalyst              | Catal. /water<br>(mg/mL) | Light source     | H <sub>2</sub> rate<br>( $\mu\text{mol h}^{-1}\text{ g}^{-1}$ ) | O <sub>2</sub> or (H <sub>2</sub> O <sub>2</sub> )<br>rate<br>( $\mu\text{mol h}^{-1}\text{ g}^{-1}$ ) | Ref. |
|-----|---------------------------------------------------------------------------------|-------------------------|--------------------------|------------------|-----------------------------------------------------------------|--------------------------------------------------------------------------------------------------------|------|
| 17. | CdS/g-C <sub>3</sub> N <sub>4</sub>                                             | Pt and MnO <sub>x</sub> | 10/100                   | 300 W Xe lamp    | 924.4                                                           | 460                                                                                                    | 18   |
| 18. | 10% Ni <sub>2</sub> P/CdS                                                       | Artificial gill         | 100/150                  | 300 W Xe lamp    | 837.9                                                           | 450                                                                                                    | 19   |
| 19. | BiFeO <sub>3</sub> /CdS                                                         | --                      | 200/100                  | 125 W Hg lamps   | 600.2                                                           | 300                                                                                                    | 20   |
| 20. | C-dot/g-C <sub>3</sub> N <sub>4</sub>                                           | --                      | 10/150                   | 300 W Xe lamp    | 568                                                             | 301                                                                                                    | 21   |
| 21. | C <sub>co</sub> -C <sub>3</sub> N <sub>4</sub>                                  | --                      | 30/80                    | 300 W Xe lamp    | 530                                                             | 255                                                                                                    | 22   |
| 22. | SrTiO <sub>3</sub> (Al)/CoO <sub>x</sub>                                        | Ni SA-NG                | 50/100                   | 280 W Xe lamp    | 498                                                             | 230                                                                                                    | 23   |
| 23. | Fe/MgO-rGO                                                                      | --                      | 20/30                    | 500 W Hg-Xe lamp | 450                                                             | --                                                                                                     | 24   |
| 24. | MnPSe <sub>3</sub>                                                              | --                      | 20/100                   | AM 1.5G          | 325                                                             | --                                                                                                     | 25   |
| 25. | BiVO <sub>4</sub> /Au/CdS                                                       | --                      | 30/100                   | 100 W Xe lamp    | 281                                                             | 138                                                                                                    | 26   |
| 26. | P-doped Mn <sub>x</sub> Cd <sub>1-x</sub> S/Ni <sub>2</sub> P                   | --                      | 30/40                    | 300 W Xe lamp    | 251                                                             | --                                                                                                     | 27   |
| 27. | Cd <sub>0.5</sub> Zn <sub>0.5</sub> S                                           | --                      | 10/100                   | 300 W Xe lamp    | 248                                                             | --                                                                                                     | 28   |
| 28. | 5%CoP/CdS-P                                                                     | --                      | 5/20                     | white LED light  | 231                                                             | H <sub>2</sub> O <sub>2</sub>                                                                          | 29   |
| 29. | Co-doped g-C <sub>3</sub> N <sub>4</sub>                                        | --                      | 10/25                    | white LED light  | 182                                                             | 165(H <sub>2</sub> O <sub>2</sub> )                                                                    | 30   |
| 30. | CZS-C-P5                                                                        | --                      | 20/100                   | 300 W Xe lamp    | 137.2                                                           | 123.8                                                                                                  | 31   |
| 31. | Fe <sub>2</sub> O <sub>3</sub> @MnO <sub>2</sub> /C <sub>3</sub> N <sub>4</sub> | --                      | 30/80                    | 300 W Xe lamp    | 124                                                             | --                                                                                                     | 32   |
| 32. | MoO <sub>3</sub> /N-MoS <sub>2</sub>                                            | --                      | 50/70                    | 400 W Xe lamp    | 118                                                             | --                                                                                                     | 33   |

A — anatase, B — brookite, R — rutilite

## References

1. L. Li, X. Yang, Y. Lei, H. Yu, Z. Yang, Z. Zheng and D. Wang, Ultrathin Fe-NiO nanosheets as catalytic charge reservoirs for a planar Mo-doped BiVO<sub>4</sub> photoanode, *Chem. Sci.*, 2018, **9**, 8860-8870.
2. H.-F. Ye, R. Shi, X. Yang, W.-F. Fu and Y. Chen, P-doped Zn<sub>x</sub>Cd<sub>1-x</sub>S solid solutions as photocatalysts for hydrogen evolution from water splitting coupled with photocatalytic oxidation of 5-hydroxymethylfurfural, *Appl. Catal. B: Environ.*, 2018, **233**, 70-79.
3. L. Ding, S. Yang, Z. Liang, X. Qian, X. Chen, H. Cui and J. Tian, TiO<sub>2</sub> nanobelts with anatase/rutile heterophase junctions for highly efficient photocatalytic overall water splitting, *J. Coll. Interf. Sci.*, 2020, **567**, 181-189.
4. C. Gao, T. Wei, Y. Zhang, X. Song, Y. Huan, H. Liu, M. Zhao, J. Yu and X. Chen, A photoresponsive rutile TiO<sub>2</sub> heterojunction with enhanced electron-hole separation for high-performance hydrogen evolution, *Adv. Mater.*, 2019, **31**, e1806596.
5. P. A. K. Reddy, P. V. L. Reddy, K.-H. Kim, M. K. Kumar, C. Manvitha and J.-J. Shim, Novel approach for the synthesis of nitrogen-doped titania with variable phase composition and enhanced production of hydrogen under solar irradiation, *J. Ind. Eng. Chem.*, 2017, **53**, 253-260.
6. Y. Bai, Y. Zhou, J. Zhang, X. Chen, Y. Zhang, J. Liu, J. Wang, F. Wang, C. Chen, C. Li, R. Li and C. Li, Homophase junction for promoting spatial charge separation in photocatalytic water splitting, *ACS Catal.*, 2019, **9**, 3242-3252.
7. Y. Zhang, H. Hu, X. Huang and Y. Bi, Photo-controlled bond changes on Pt/TiO<sub>2</sub> for promoting overall water splitting and restraining hydrogen–oxygen recombination, *J. Mater. Chem. A*, 2019, **7**, 5938-5942.
8. R. Li, Y. Weng, X. Zhou, X. Wang, Y. Mi, R. Chong, H. Han and C. Li, Achieving overall water

- splitting using titanium dioxide-based photocatalysts of different phases, *Energy Environ. Sci.*, 2015, **8**, 2377-2382.
9. M. Solakidou, A. Giannakas, Y. Georgiou, N. Boukos, M. Louloudi and Y. Deligiannakis, Efficient photocatalytic water-splitting performance by ternary CdS/Pt-N-TiO<sub>2</sub> and CdS/Pt-N,F-TiO<sub>2</sub>: Interplay between CdS photo corrosion and TiO<sub>2</sub>-dopping, *Appl. Catal. B: Environ.*, 2019, **254**, 194-205.
10. Z. Ai, K. Zhang, L. Xu, M. Huang, D. Shi, Y. Shao, J. Shen, Y. Wu and X. Hao, In situ configuration of dual S-scheme BP/(Ti<sub>3</sub>C<sub>2</sub>T<sub>x</sub>@TiO<sub>2</sub>) heterojunction for broadband spectrum solar-driven photocatalytic H<sub>2</sub> evolution in pure water, *J. Colloid Interface Sci.*, 2022, **610**, 13-23.
11. Y. Li, X. Deng, J. Tian, Z. Liang and H. Cui, Ti<sub>3</sub>C<sub>2</sub> MXene-derived Ti<sub>3</sub>C<sub>2</sub>/TiO<sub>2</sub> nanoflowers for noble-metal-free photocatalytic overall water splitting, *Appl. Mater. Today*, 2018, **13**, 217-227.
12. Z. Ai, Y. Shao, B. Chang, B. Huang, Y. Wu and X. Hao, Effective orientation control of photogenerated carrier separation via rational design of a Ti<sub>3</sub>C<sub>2</sub>(TiO<sub>2</sub>)@CdS/MoS<sub>2</sub> photocatalytic system, *Appl. Catal. B: Environ.*, 2019, **242**, 202-208.
13. Y. Jiang, Z. Sun, Q. Chen, C. Cao, Y. Zhao, W. Yang, L. Zeng and L. Huang, Fabrication of 0D/2D TiO<sub>2</sub> Nanodots/g-C<sub>3</sub>N<sub>4</sub> S-scheme heterojunction photocatalyst for efficient photocatalytic overall water splitting, *Appl. Sur. Sci.*, 2022, **571**, 151287.
14. T. C. Bhagya, A. Krishnan, A. R. S, A. S. M, B. R. Sreelekshmy, P. Jineesh and S. M. A. Shibli, Exploration and evaluation of proton source-assisted photocatalyst for hydrogen generation, *Photochem. Photobiol. Sci.*, 2019, **18**, 1716-1726.
15. H. V. Dang, Y. H. Wang and J. C. S. Wu, Z-scheme photocatalyst Pt/GaP-TiO<sub>2</sub>-SiO<sub>2</sub>:Rh for the separated H<sub>2</sub> evolution from photocatalytic seawater splitting, *Appl. Catal. B: Environ.*, 2021,

296, 120339.

16. J. Liu, J. Ke, Y. Li, B. Liu, L. Wang, H. Xiao and S. Wang, Co<sub>3</sub>O<sub>4</sub> quantum dots/TiO<sub>2</sub> nanobelt hybrids for highly efficient photocatalytic overall water splitting, *Appl. Catal. B: Environ.*, 2018, **236**, 396-403.
17. W. Che, H. Su, X. Zhao, Y. Li, H. Zhang, W. Zhou, M. Liu, W. Cheng, F. Hu and Q. Liu, An on-demand solar hydrogen-evolution system for unassisted high-efficiency pure-water splitting, *J. Mater. Chem. A*, 2019, **7**, 17315-17323.
18. X. Zhou, Y. Fang, X. Cai, S. Zhang, S. Yang, H. Wang, X. Zhong and Y. Fang, In situ photodeposited construction of Pt–CdS/g-C<sub>3</sub>N<sub>4</sub>–MnO<sub>x</sub> composite photocatalyst for efficient visible-light-driven overall water splitting, *ACS Appl. Mater. Interfaces*, 2020, **12**, 20579-20588.
19. W. Zhen, X. Ning, B. Yang, Y. Wu, Z. Li and G. Lu, The enhancement of CdS photocatalytic activity for water splitting via anti-photocorrosion by coating Ni<sub>2</sub>P shell and removing nascent formed oxygen with artificial gill, *Appl. Catal. B: Environ.*, 2018, **221**, 243-257.
20. A. Kolivand and S. Sharifnia, Enhanced photocatalytic hydrogen evolution from water splitting by Z - scheme CdS/BiFeO<sub>3</sub> heterojunction without using sacrificial agent, *Int. J. Energy Res.*, 2020, **45**, 2739-2752.
21. J. Liu, Y. Liu, N. Liu, Y. Han, X. Zhang, H. Huang, Y. Lifshitz, S. T. Lee, J. Zhong and Z. Kang, Water splitting. Metal-free efficient photocatalyst for stable visible water splitting via a two-electron pathway, *Science*, 2015, **347**, 970-974.
22. X. Fang, R. Gao, Y. Yang and D. Yan, A cocrystal precursor strategy for carbon-rich graphitic carbon nitride toward high-efficiency photocatalytic overall water splitting, *IScience*, 2019, **16**, 22-30.



23. Y. Liu, X. Xu, S. Zheng, S. Lv, H. Li, Z. Si, X. Wu, R. Ran, D. Weng and F. Kang, Ni single atoms anchored on nitrogen-doped graphene as H<sub>2</sub>-Evolution cocatalyst of SrTiO<sub>3</sub>(Al)/CoO for photocatalytic overall water splitting, *Carbon*, 2021, **183**, 763-773.
24. F. Sharmin, D. Chandra Roy and M. A. Basith, Photocatalytic water splitting ability of Fe/MgO-rGO nanocomposites towards hydrogen evolution, *Int. J. Hydrogen Energy*, 2021, **46**, 38232-38246.
25. T. A. Shifa, F. Wang, Z. Cheng, P. He, Y. Liu, C. Jiang, Z. Wang and J. He, High crystal quality 2D manganese phosphorus trichalcogenide nanosheets and their photocatalytic activity, *Adv. Funct. Mater.*, 2018, **28**, 1800548.
26. X. Xu, Z. Wang, W. Qiao, F. Luo, J. Hu, D. Wang and Y. Zhou, Refined Z-scheme charge transfer in facet-selective BiVO<sub>4</sub>/Au/CdS heterostructure for solar overall water splitting, *Int. J. Hydrogen Energy*, 2021, **46**, 8531-8538.
27. J. Yan and L. Shi, The preparation of 0D/2D P - doped MnxCd<sub>1-x</sub>S/Ni<sub>2</sub>P photocatalyst and its photocatalytic activity of pure water splitting for H<sub>2</sub>, *Int. J. Energy Res.*, 2022, **46**, 8218-8228.
28. W. Xue, X. Bai, J. Tian, X. Ma, X. Hu, J. Fan and E. Liu, Enhanced photocatalytic H<sub>2</sub> evolution on ultrathin Cd<sub>0.5</sub>Zn<sub>0.5</sub>S nanosheets without a hole scavenger: Combined analysis of surface reaction kinetics and energy-level alignment, *Chem. Eng. J.*, 2022, **428**, 132608.
29. R. Shi, H.-F. Ye, F. Liang, Z. Wang, K. Li, Y. Weng, Z. Lin, W.-F. Fu, C.-M. Che and Y. Chen, Interstitial P-doped CdS with long-lived photogenerated electrons for photocatalytic water splitting without sacrificial agents, *Adv. Mater.*, 2018, **30**, 1705941.
30. Y. Dou, C. Zhu, M. Zhu, Y. Fu, H. Wang, C. Shi, H. Huang, Y. Liu and Z. Kang, Highly mesoporous carbon nitride photocatalysts for efficient and stable overall water splitting, *Appl.*

*Surf. Sci.*, 2020, **509**, 144706.

31. F. Liu, F. Xue, Y. Si, G. Chen, X. Guan, K. Lu and M. Liu, Functionalized Cd<sub>0.5</sub>Zn<sub>0.5</sub>S chalcogenide nanotwins enabling Z-scheme photocatalytic water splitting, *ACS Appl. Nano Mater.*, 2021, **4**, 759-768.
32. N. Wang, L. Wu, J. Li, J. Mo, Q. Peng and X. Li, Construction of hierarchical Fe<sub>2</sub>O<sub>3</sub>@MnO<sub>2</sub> core/shell nanocube supported C<sub>3</sub>N<sub>4</sub> for dual Z-scheme photocatalytic water splitting, *Sol. Energy Mater. Sol. Cells*, 2020, **215**, 110624.
33. N. R. Khalid, M. Rizwan Kamal, M. B. Tahir, M. Rafique, N. A. Niaz, Y. Ali, M. Alzaid, H. Alrobei and S. Muhammad, Fabrication of direct Z-scheme MoO<sub>3</sub>/N–MoS<sub>2</sub> photocatalyst for synergistically enhanced H<sub>2</sub> production, *Int. J. Hydrogen Energy*, 2021, **46**, 39822-39829.
